# Supplementary material for: Direct Reprograming of Mouse Fibroblasts into Dermal Papilla Cells via Small Molecules
Source: MDPI journal article supplement (doi:10.3390/ijms23084213), 2022-04-11
Supplement: s1 [file s1]

### Supplementary Material

**Table S1.** Sequencing metrics and quality check results for RNA sequencing raw reads.

| Sample name | Raw reads  | Clean reads | Clean bases | Error rate | Q20 (%) | Q30 (%) | GC %  |
|-------------|------------|-------------|-------------|------------|---------|---------|-------|
| T1          | 45,945,762 | 44,109,716  | 6.62G       | 0.03       | 97.68   | 93.74   | 51    |
| T2          | 44,778,854 | 42,842,164  | 6.43G       | 0.03       | 97.76   | 93.95   | 51.05 |
| T3          | 47,303,014 | 45,132,988  | 6.77G       | 0.03       | 96.45   | 90.94   | 51.24 |
| C1          | 44,941,598 | 43,066,674  | 6.46G       | 0.03       | 97.71   | 93.81   | 50.95 |
| C2          | 46,414,448 | 44,369,324  | 6.66G       | 0.03       | 97.71   | 93.81   | 51.84 |
| C3          | 44,171,190 | 42,312,892  | 6.35G       | 0.03       | 97.74   | 93.84   | 50.81 |

Q20 (%): the percentage of reads above quality score 20; Q30 %: the percentage of reads above quality score 30; GC %: the percentage of proportion of guanine and cytosine nucleotides among total nucleotides.

**Table S2.** Alignment of sample sequencing data with reference genomes.

| Sample name | Total Reads | Total Map          | Multi Map        | Read1 Map          | Read2 Map          |
|-------------|-------------|--------------------|------------------|--------------------|--------------------|
| T1          | 44,109,716  | 42,114,225(95.48%) | 1,877,921(4.26%) | 20,156,595(45.7%)  | 20,079,709(45.52%) |
| T2          | 42,842,164  | 40,881,175(95.42%) | 1,848,732(4.32%) | 19,549,856(45.63%) | 19,482,587(45.48%) |
| T3          | 45,132,988  | 42,713,461(94.64%) | 1,884,225(4.17%) | 20,583,056(45.61%) | 20,246,180(44.86%) |
| C1          | 43,066,674  | 41,219,123(95.71%) | 1,923,547(4.47%) | 19,682,351(45.7%)  | 19,613,225(45.54%) |
| C2          | 44,369,324  | 42,312,157(95.36%) | 1,823,724(4.11%) | 20,278,454(45.7%)  | 20,209,979(45.55%) |
| C3          | 42,312,892  | 40,501,347(95.72%) | 1,892,616(4.47%) | 19,341,391(45.71%) | 19,267,340(45.54%) |

**Table S3.** Top 10 hub genes in network ranked by different methods.

| Rank | Method |        |        |        |            |              |           |           |             |          |                        |        |
|------|--------|--------|--------|--------|------------|--------------|-----------|-----------|-------------|----------|------------------------|--------|
|      | Degree | MCC    | DMNC   | MNC    | BottleNeck | EcCentricity | Closeness | Radiality | Betweenness | Stress   | Clustering-Coefficient | EPC    |
| 1    | Il6    | Cxcl5  | Ccr10  | Il6    | Il6        | Tnfsf11      | Il6       | Il6       | Il6         | Il6      | Inhba                  | Il6    |
| 2    | Cxcl12 | Cxcl10 | Ccl9   | Cxcl12 | Bmp4       | Il6          | Cxcl12    | Cxcl12    | Tgfb1       | Tgfb1    | Gdf7                   | Cxcl12 |
| 3    | Il15   | Cxcl13 | Il16   | Il15   | Il15       | Ngf          | Il15      | Tgfb1     | Cxcl12      | Cxcl12   | Ackr3                  | Cxcl10 |
| 4    | Cxcl1  | Cxcl1  | Ppbp   | Cxcl1  | Cxcl12     | Tnfrsf12a    | Tgfb1     | Il15      | Tnfrsf12a   | Acvr2a   | Il16                   | Cxcl1  |
| 5    | Cxcl10 | Ccl11  | Cxcl14 | Cxcl10 | Il1rn      | Cxcl12       | Cxcl10    | Tnfsf11   | Il15        | Bmp4     | Gdf6                   | Il18   |
| 6    | Cxcl5  | Cxcl12 | Ccl6   | Cxcl5  | Tnfrsf12a  | Fas          | Cxcl1     | Cxcl10    | Bmp4        | Acvr1l   | Gdf10                  | Cxcl5  |
| 7    | Tgfb1  | Il6    | Ccl8   | Cxcl13 | Acvr2b     | Tnfsf13b     | Cxcl5     | Cxcl1     | Tnfsf11     | Bmpr1b   | Ccr10                  | Tgfb1  |
| 8    | Cxcl13 | Il15   | Ackr3  | Il18   | Cxcl1      | Clcf1        | Il18      | Cxcl5     | Il18        | Acvr2b   | Ppbp                   | Il15   |
| 9    | Il18   | Il18   | Inhba  | Tgfb1  | Tgfb1      | Il11ra1      | Tnfsf11   | Il18      | Ngfr        | Bmp7     | Il34                   | Cxcl13 |
| 10   | Ccl11  | Ccl9   | Ccl11  | Ccl11  | Tnfsf13b   | Ctf1         | Cxcl13    | Ccl11     | Bmp7        | Tnfrsf19 | Il1rl2                 | Ccl11  |
